# Supplementary material for: Stereoselective metabolism of the UV-filter 2-ethylhexyl 4-dimethylaminobenzoate and its metabolites in rabbits in vivo and vitro
Source: Royal Society of Chemistry journal article supplement (doi:10.1039/c7ra00431a), 2017-01-01
Supplement: c7ra00431a1.pdf [file c7ra00431a1.pdf]

**Figs. S1.** Chromatographic separation and elution orders of EDP and its metabolites on Chiralpak IC. The inset represents the ORD signal.

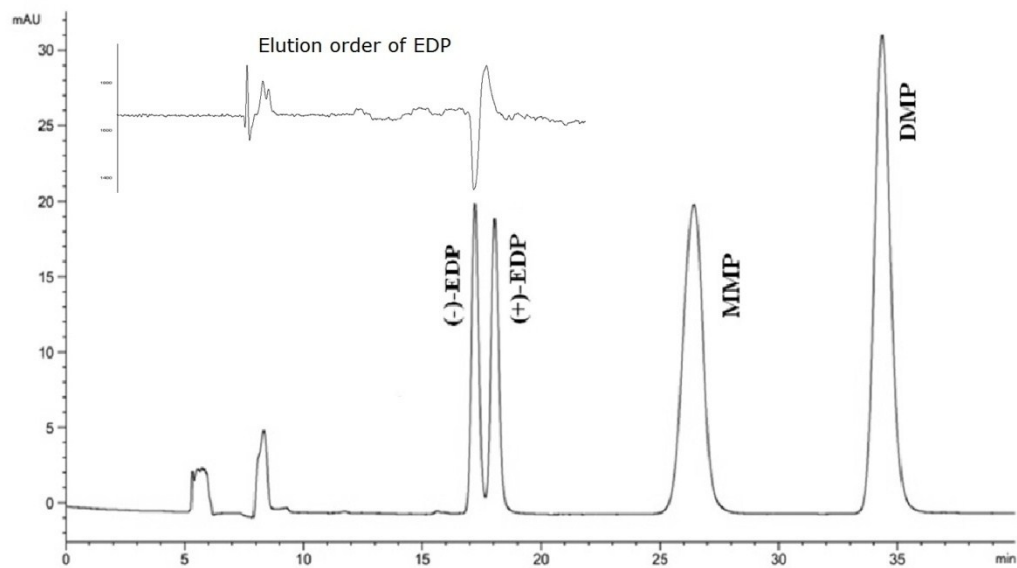

**Table. S1.** Stereoselective separations of EDP on Chiralpak IC with *n*-hexane/2-propanol.

| content of 2-propanol<br>(%, V/V) | 2    | 5    | 10   | 15   | 20   |
|-----------------------------------|------|------|------|------|------|
| Rs                                | 2.36 | 1.91 | 1.56 | 1.33 | 1.18 |
| $\alpha$                          | 1.10 | 1.09 | 1.08 | 1.07 | 1.07 |

**Table. S2.** Effect of temperature on the enantiomeric separation of EDP.

| <b>Temperature</b><br>°C | <b>k<sub>1</sub></b> | <b>k<sub>2</sub></b> | <b><math>\alpha</math></b> | <b>Rs</b> |
|--------------------------|----------------------|----------------------|----------------------------|-----------|
| 5                        | 3.05                 | 3.34                 | 1.10                       | 1.58      |
| 10                       | 2.83                 | 3.09                 | 1.09                       | 2.32      |
| 15                       | 2.57                 | 2.78                 | 1.08                       | 2.86      |
| 20                       | 2.37                 | 2.55                 | 1.08                       | 3.01      |
| 25                       | 2.16                 | 2.31                 | 1.07                       | 2.75      |
| 30                       | 1.99                 | 2.11                 | 1.06                       | 2.55      |

**Table. S3.** Summary of average recovery of (+)-OD-PABA, (-)-OD-PABA, 4-DBA and 4-MBA.

| Analytes            | Spiked level (mg/kg) | (+)-OD-PABA | (-)-OD-PABA | 4-DBA      | 4-MBA      |
|---------------------|----------------------|-------------|-------------|------------|------------|
| Plasma              | 0.5                  | 85.2±7.3    | 86.1±7.7    | 104.2±2.1  | 102.8±4.8  |
|                     | 5                    | 92.1±5.2    | 94.5±3.0    | 99.6±4.4   | 95.4±4.6   |
|                     | 50                   | 98.2±5.2    | 98.9±6.9    | 91.5±7.4   | 88.7±6.2   |
| 10% plasma solution | 0.5                  | 87.1±6.3    | 97.4±7.8    | 100.5±4.3  | 95.3±4.9   |
|                     | 5                    | 89.9±4.2    | 90.8±6.6    | 103.0±5.7  | 97.1±3.5   |
|                     | 50                   | 93.5±5.4    | 96.2±2.1    | 98.8±3.3   | 97.2±2.9   |
| Microsome solution  | 0.5                  | 84.7±7.6    | 82.3±5.2    | 100.9±2.1  | 99.7±5.7   |
|                     | 5                    | 85.1±6.4    | 99.3±3.9    | 85.9±7.1   | 102.5±6.3  |
|                     | 50                   | 108.5±5.3   | 96.8±4.9    | 95.3±6.2   | 100.6±2.6  |
| Brain               | 0.5                  | 85.2±2.6    | 86.9±8.3    | 108.6±4.8  | 104.1±7.6  |
|                     | 5                    | 98.9±6.7    | 106.6±9.8   | 95.8±10.6  | 95.7±3.2   |
|                     | 50                   | 97.2±2.5    | 81.6±11.0   | 82.9±12.8  | 83.7±3.2   |
| Kidney              | 0.5                  | 95.2±2.8    | 94.7±4.8    | 81.3±8.8   | 104.6±4.4  |
|                     | 5                    | 98.2±2.5    | 95.0±10.2   | 103.7±8.7  | 81.5±8.4   |
|                     | 50                   | 98.4±10.7   | 90.2±8.8    | 86.6±9.9   | 103.8±12.0 |
| Lung                | 0.5                  | 100.0±3.0   | 101.2±4.8   | 97.6±5.3   | 97.4±6.4   |
|                     | 5                    | 100.3±5.7   | 97.7±11.1   | 103.7±2.7  | 94.1±4.6   |
|                     | 50                   | 90.1±8.2    | 84.3±4.7    | 99.8±9.1   | 105.6±11.8 |
| Liver               | 0.5                  | 85.0±5.1    | 105.0±3.7   | 93.9±6.8   | 90.9±2.4   |
|                     | 5                    | 89.5±11.2   | 102.3±5.3   | 81.5±8.3   | 102.3±6.9  |
|                     | 50                   | 104.7±5.5   | 91.2±9.9    | 102.7±6.7  | 84.9±8.1   |
| Urine               | 0.5                  | 87.7±9.7    | 96.4±5.6    | 93.7±5.3   | 91.1±12.3  |
|                     | 5                    | 86.5±11.1   | 85.6±3.5    | 96.9±9.6   | 93.4±11.6  |
|                     | 50                   | 89.4±7.0    | 86.3±5.3    | 107.1±10.8 | 98.8±6.3   |
| Feces               | 0.5                  | 103.4±2.0   | 105.6±11.9  | 99.6±11.4  | 84.4±11.9  |
|                     | 5                    | 84.5±10.7   | 95.7±2.9    | 95.4±9.4   | 102.1±5.1  |
|                     | 50                   | 82.7±6.3    | 105.4±12.2  | 101.3±6.3  | 88.3±2.0   |

**Table. S4.** The concentration of EDP, DMP and MMP in rabbit brain, kidney, lung and liver at 3 h.

| <b>Tissues</b> | <b>C(mg kg<sup>-1</sup>)/3 h</b> |            |            |
|----------------|----------------------------------|------------|------------|
|                | <b>EDP</b>                       | <b>DMP</b> | <b>MMP</b> |
| <b>brain</b>   | ND                               | ND         | ND         |
| <b>kidney</b>  | ND                               | 0.72±0.28  | ND         |
| <b>lung</b>    | ND                               | ND         | ND         |
| <b>liver</b>   | ND                               | 1.08±0.34  | ND         |

**Table.S5.** Excretion rate of EDP, DMP and MMP by urine and feces.

| <b>Excreta</b> | <b>EDP</b> | <b>DMP</b>  | <b>MMP</b>  |
|----------------|------------|-------------|-------------|
| <b>Urine</b>   | ND         | 1.39%±0.10% | 0.28%±0.09% |
| <b>Feces</b>   | ND         | 0.05%±0.01% | 0.07%±0.05% |
